# Supplementary material for: Identification and Classification of Conserved RNA Secondary Structures in the Human Genome
Source: PLOS journal article supplement (doi:10.1371/journal.pcbi.0020033), 2006-04-17
Supplement: S1 (10.1371/journal.pcbi.0020033.s001) [file journal.pcbi.0020033.s001]

Table S2: Count statistics for short fold classes

| type\location  | 5'UTR |        |    | 3'UTR |        |      | coding |        |      | intronic |       |      | intergenic |        |      | any location |       |       |
|----------------|-------|--------|----|-------|--------|------|--------|--------|------|----------|-------|------|------------|--------|------|--------------|-------|-------|
| hairpin        | 263   | (20%)  | 53 | 2567  | (44%)  | 1139 | 10945  | (20%)  | 2217 | 8965     | (41%) | 3668 | 15667      | (42%)  | 6538 | 38407        | (35%) | 13614 |
| Y-shaped       | 3     | (67%)  | 2  | 49    | (11%)  | 5    | 327    | (30%)  | 99   | 120      | (50%) | 60   | 160        | (33%)  | 52   | 659          | (33%) | 219   |
| clover-shaped  | 0     | (n.a.) | 0  | 0     | (n.a.) | 0    | 6      | (80%)  | 5    | 1        | (0%)  | 0    | 1          | (100%) | 1    | 8            | (75%) | 6     |
| complex shapes | 0     | (n.a.) | 0  | 0     | (n.a.) | 0    | 0      | (n.a.) | 0    | 1        | (0%)  | 0    | 0          | (n.a.) | 0    | 1            | (0%)  | 0     |
| any shape      | 266   | (21%)  | 55 | 2616  | (44%)  | 1144 | 11278  | (21%)  | 2321 | 9087     | (41%) | 3728 | 15828      | (42%)  | 6591 | 39075        | (35%) | 13839 |

The fold counts, estimated true positive rate (in parenthesis), and estimated true positive counts are given for each location/shape-class of short folds. The “any shape” row and the “any location” column gives the marginalized counts for each set of fold classes. The entry at the lower right corner thus holds the overall counts for the set of long folds.
