# Supplementary material for: Identification and Classification of Conserved RNA Secondary Structures in the Human Genome
Source: PLOS journal article supplement (doi:10.1371/journal.pcbi.0020033), 2006-04-17
Supplement: S3 (10.1371/journal.pcbi.0020033.s003) [file journal.pcbi.0020033.s003]

Table S1: Strand bias of EvoFold predictions

| Genic region | count | ass. statistic | P-value <sup>b</sup> |
|--------------|-------|----------------|----------------------|
| coding       | 10551 | 0.496          | 0.47                 |
| 5'UTR        | 207   | 0.553          | 0.164                |
| 3'UTR        | 2725  | 0.646          | $< 2.2e - 16$        |
| intron       | 9603  | 0.558          | $< 2.2e - 16$        |
| combined     | 23086 | 0.549          | $< 2.2e - 16$        |

---

<sup>b</sup>The association statistic was assumed to be binomial distributed with parameter  $p=0.5$ . The alternative hypothesis is that  $p$  deviates from 0.5.
