# Supplementary material for: Identification and Classification of Conserved RNA Secondary Structures in the Human Genome
Source: PLOS journal article supplement (doi:10.1371/journal.pcbi.0020033), 2006-04-17
Supplement: S3 (10.1371/journal.pcbi.0020033.s003) [file journal.pcbi.0020033.s003]

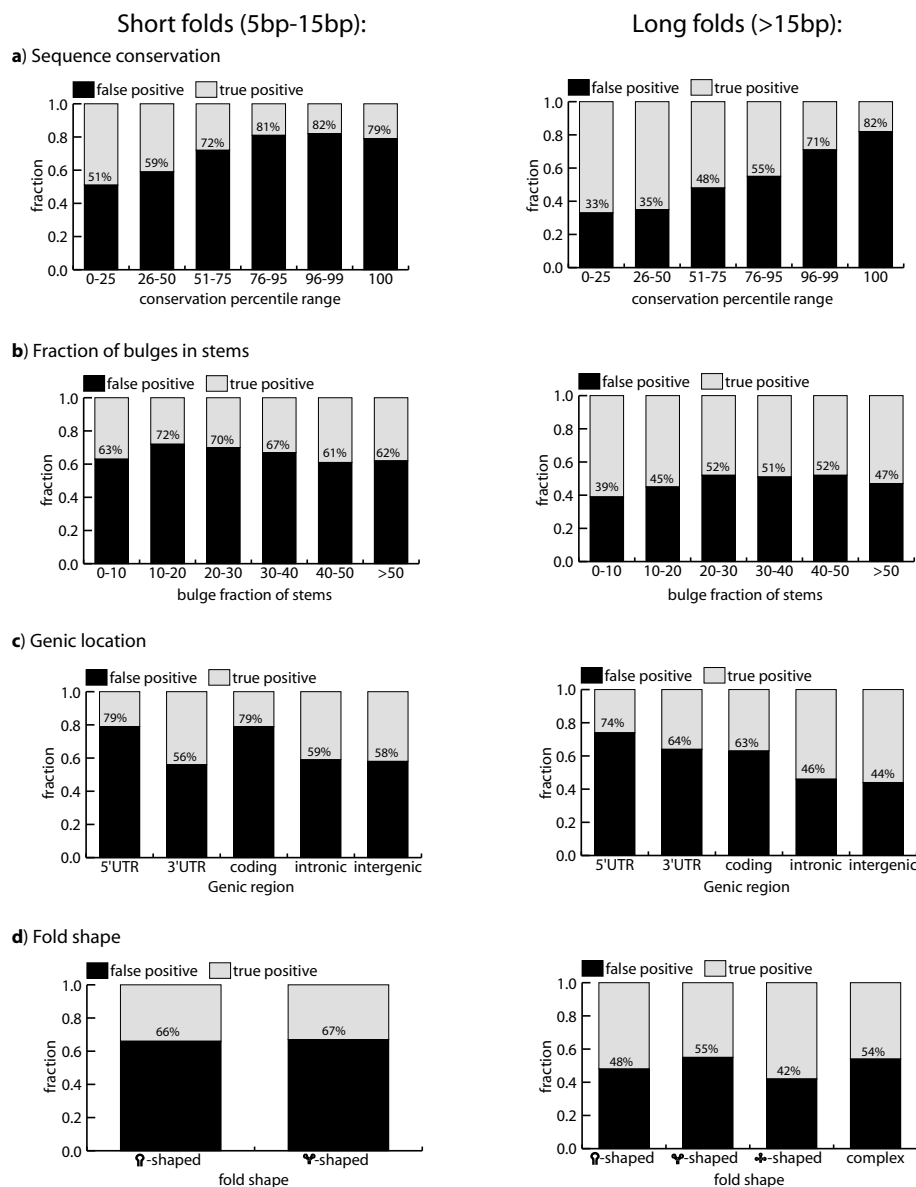

Figure S3: Estimated fraction of false positive predictions as a function of various fold properties for short (left) as well as long (right) folds. For all figures the x-axis gives a measure (or type) of the property in question and the y-axis gives the corresponding fraction of false positive. Definition of properties: **a**: The sequence conservation scores are measured at the input element level and the percentiles are relative to their distribution among all the folds. **b**: The bulge fraction is the percentage of bases in stems found in bulges. **c and d**: The genic location and the fold shape is taken from the fold classification scheme (see methods section of main text for definitions).
