# Supplementary material for: Identification and Classification of Conserved RNA Secondary Structures in the Human Genome
Source: PLOS journal article supplement (doi:10.1371/journal.pcbi.0020033), 2006-04-17
Supplement: S5 (10.1371/journal.pcbi.0020033.s005) [file journal.pcbi.0020033.s005]

**a)**

begin\_non-structural  $\rightarrow$  unpaired  
unpaired  $\rightarrow$  unpaired  $x$  | end  $x$

**b)**

begin\_structural  $\rightarrow$  stem\_pair  
stem\_pair  $\rightarrow x_l$  stem\_pair  $x_r$  |  $x_l$  bifurcation  $x_r$   
bifurcation  $\rightarrow$  emit intermediate  
emit  $\rightarrow$  loop\_&\_bulge | stem\_pair  
loop\_&\_bulge  $\rightarrow$  end  $x$   
intermediate  $\rightarrow$  bifurcation | emit

Figure S5: Production rules of the non-structural component (**a**) and the structural component (**b**). Nomenclature: '|' denotes a choice between different productions;  $x$  denotes single column emissions;  $x_l$  and  $x_r$  denotes the left and right part of pair emissions, respectively. A corresponding graphical overview of these grammar components are given in fig. S6.
