# Supplementary material for: Identification and Classification of Conserved RNA Secondary Structures in the Human Genome
Source: PLOS journal article supplement (doi:10.1371/journal.pcbi.0020033), 2006-04-17
Supplement: S6 (10.1371/journal.pcbi.0020033.s006) [file journal.pcbi.0020033.s006]

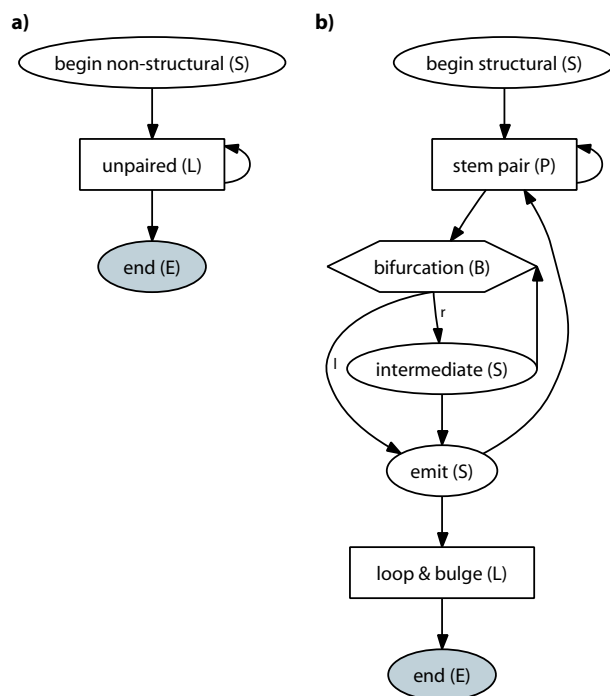

Figure S6: Transition graphs of the non-structural component **(a)** and the structural component **(b)** of the phylo-SCFGs. The state types are given in parenthesis. Arrows indicate possible state transitions. The transition from the *bifurcation* state leads to two states, a left (l) and a right (r), as indicated on the graph. The *unpaired* and the *loop & bulge* states have associated single-column emission distributions (specified by a single-nucleotide phylogenetic model). The *stem pair* state has an associated di-column emission distribution (specified by a di-nucleotide phylogenetic model).
